# Supplementary material
Source: publisher figshare collection journal article supplement (https://sage.figshare.com/ndownloader/files/16107086)
Supplement: Supplementary file 1 [file 16107086]

Appendix A: Brief background on colonial street names in Saigon.

| ITEM | STREET NAME        | PERSONALITY OR<br>OBJECT HONORED                                                                     | DOMAIN OF<br>ENTITY HONORED |   |   |   |   |
|------|--------------------|------------------------------------------------------------------------------------------------------|-----------------------------|---|---|---|---|
|      |                    |                                                                                                      | 1                           | 2 | 3 | 4 | 5 |
| 1.   | Rue d'Adran        | Msgnr Pigneau Behaine,<br>Bishop of Adran                                                            |                             | X |   |   |   |
| 2.   | Rue d'Arfeuille    | Capt. Charles Hippulyte<br>d'ARFEUILLE                                                               | X                           |   | X |   |   |
| 3.   | Rue d'Ariès        | Joseph-Hyacinthe-Jules                                                                               | X                           |   |   |   |   |
| 4.   | Rue de l'Avalanche | Gunboat of the squadron<br>of Genouilly                                                              |                             |   |   |   | X |
| 5.   | Rue d'Ayot         | Lt. d'Ayot                                                                                           | X                           |   |   |   |   |
| 6.   | Rue de Bangkok     | Named in honor of<br>Bangkok, capital of the<br>Kingdom of Siam.                                     |                             |   |   |   | X |
| 7.   | Rue Barbet         | Capt. Barbet                                                                                         | X                           |   |   |   |   |
| 8.   | Rue Barbier        | M. le Baron BARBIER                                                                                  |                             |   | X |   |   |
| 9.   | Quai de Belgique   | Belgium (for interrupting<br>the Passage of German<br>troops in World War I)                         |                             |   |   |   | X |
| 10.  | Rue Paul Blanchy   | Paul BLANCHY                                                                                         |                             |   | X |   |   |
| 11.  | Rue Blansubé       | Marie-Jules BLANSUBE                                                                                 |                             |   | X |   |   |
| 12.  | Blvd Bonard        | Louis-Adolphe BONARD                                                                                 | X                           |   |   |   |   |
| 13.  | Rue Boresse        | Léon Duhamel BORESSE                                                                                 | X                           |   |   |   |   |
| 14.  | Rue Bourdais       | Capt. BOURDAIS                                                                                       | X                           |   |   |   |   |
| 15.  | Rue Carabelli      | M. CARABELLI                                                                                         |                             |   | X |   |   |
| 16.  | Rue Cardi          | Dr. M. CARDI                                                                                         |                             |   | X |   |   |
| 17.  | Rue Cartinat       | Military Gunship                                                                                     | X                           |   |   |   |   |
| 18.  | Rue Miss Cawell    | CAWELL (An English<br>nurse who treated<br>wounded French and<br>Belgian soldiers in World<br>War I) |                             |   |   |   | X |
| 19.  | Rue Chaigneau      | Jean-Baptiste<br>CHAIGNEAU                                                                           |                             |   |   |   | X |
| 20.  | Blvd Charner       | Leonard-Victor-Joseph<br>CHARNER                                                                     | X                           |   |   |   |   |

Domain Key: 1 = Military; 2. Clergy; 3. Gov't Administration; 4. Science/Culture;

5. Other. Source: gallica.bnf.fr/Bibliothèque nationale de France.

Appendix A (Cont'd): Brief background on colonial street names in Saigon.

| ITEM | STREET NAME                 | PERSONALITY OR<br>OBJECT HONORED                                            | DOMAIN OF<br>ENTITY HONORED |   |   |   |   |
|------|-----------------------------|-----------------------------------------------------------------------------|-----------------------------|---|---|---|---|
|      |                             |                                                                             | 1                           | 2 | 3 | 4 | 5 |
| 21.  | Rue Chasseloup-<br>Laubat   | M. DE CHASSELOUP-<br>LAUBAT                                                 |                             |   | X |   |   |
| 22.  | Rue Colombert               |                                                                             |                             | X |   |   |   |
| 23.  | Rue Colombier               | Jean-Antoine<br>COLOMBIER<br>(Philanthropist)                               |                             |   |   |   | X |
| 24.  | Rue Cornulier-<br>Lucinière | Admiral CORNULIER-<br>LUCINIÈRE                                             | X                           |   |   |   |   |
| 25.  | Rue Amiral<br>Courbet       | Vice Admiral COURBET                                                        | X                           |   |   |   |   |
| 26.  | Rue Doudart de<br>Lagrée    | Capt. Ernest-Marc-Louis<br>DE LAGREE                                        | X                           |   |   |   |   |
| 27.  | Rue Duperré                 | Admiral DUPERRE                                                             | X                           |   | X |   |   |
| 28.  | Rue Amiral Dupré            | Admiral DUPRE                                                               | X                           |   | X |   |   |
| 29.  | Rue Duranton                | M. DURANTON                                                                 |                             |   | X |   |   |
| 30.  | Rue d'Espagne               | To commemorate the<br>Franco-Spanish expedition<br>of Cochinchina 1858-1859 |                             |   |   |   | X |
| 31.  | Rue Eyriaud des<br>Vergnes  | EYRIAUD DES VERGNES                                                         |                             |   |   |   | X |
| 32.  | Ruelle Farinole             | Antoine Jean-Baptiste<br>FARINOLE                                           |                             |   |   |   | X |
| 33.  | Rue de Faucault             | Lt. DE FAUCAULT                                                             | X                           |   |   |   |   |
| 34.  | Rue Filippini               | M. FILIPPINI                                                                |                             |   | X |   |   |
| 35.  | Rue Frostin                 | FROSTIN                                                                     | X                           |   |   |   |   |
| 36.  | Blvd Galliéni               | Gen. Joseph GALLIENI                                                        | X                           |   | X |   |   |
| 37.  | Rue Gallimard               | Capt. GALLIMARD                                                             | X                           |   |   |   |   |
| 38.  | Rue Garcerie                | Raphael-Antoine-<br>Guillaume GARCERIE                                      |                             |   |   |   | X |
| 39.  | Quai Francis-<br>Garnier    | Marie-Joseph-Francois<br>GARNIER                                            | X                           |   |   |   |   |
| 40.  | Rue Hamlin                  | Admiral HAMELIN                                                             | X                           |   |   |   |   |
| 41.  | Rue Jaureguiberry           | Capt. JAUREGUIBERRY                                                         | X                           |   |   |   |   |
| 42.  | Rue Krantz                  | Admiral KRANTZ                                                              | X                           |   |   |   |   |
| 43.  | Rue Lacote                  | Theodore, Pierre, LACOTE                                                    |                             |   | X |   |   |

Domain Key: 1 = Military; 2. Clergy; 3. Gov't Administration; 4. Science/Culture; 5. Other. Source: gallica.bnf.fr/Bibliothèque nationale de France.

Appendix A (Cont'd): Brief background on colonial street names in Saigon.

| ITEM | STREET NAME                 | PERSONALITY OR<br>OBJECT HONORED                                                                                     | DOMAIN OF<br>ENTITY HONORED |   |   |   |   |
|------|-----------------------------|----------------------------------------------------------------------------------------------------------------------|-----------------------------|---|---|---|---|
|      |                             |                                                                                                                      | 1                           | 2 | 3 | 4 | 5 |
| 44.  | Rue Lafont                  | Admiral LAFONT                                                                                                       | X                           |   | X |   |   |
| 45.  | Rue La Grandière            | Pierre Paul LA GRANDIER                                                                                              |                             |   | X |   |   |
| 46.  | Rue Lanzarotte              | Col. LANZOROTTE                                                                                                      | X                           |   |   |   |   |
| 47.  | Rue Larclauze               | Capt. LARCLAUZE                                                                                                      | X                           |   |   |   |   |
| 48.  | Rue Lareynière              | LAREYNIERE                                                                                                           | X                           |   |   |   |   |
| 49.  | Rue Lefebvre                | Msgnr. LEFEBVRE                                                                                                      |                             | X |   |   |   |
| 50.  | Rue Legrand de la<br>Liraye | Theophile-Marie<br>LEGRAND DE LA LIRAYE                                                                              |                             | X |   |   |   |
| 51.  | Rue Lesèble                 | M. LESEBLE                                                                                                           | X                           |   |   |   |   |
| 52.  | Blvd Luro                   | Jean-Baptiste LURO                                                                                                   |                             |   | X |   |   |
| 53.  | Rue Mac-Mahon               | Edme-Patrice-Maurice<br>MAC-MAHON                                                                                    | X                           |   |   |   |   |
| 54.  | Rue Marchaisse              | Lt-Col. MARCHAISSE                                                                                                   | X                           |   |   |   |   |
| 55.  | Quai de la Marne            | Named to commemorate a<br>World War I battle from 6-<br>13 September 1914 which<br>ended in favour of the<br>French. | X                           |   |   |   | X |
| 56.  | Rue Martin des<br>Pallières | MARTIN des PALLIERES                                                                                                 | X                           |   |   |   |   |
| 57.  | Rue Mayer                   | M. MAYER                                                                                                             |                             |   |   |   | X |
| 58.  | Rue Miche                   | Msgnr. MISHE                                                                                                         |                             | X |   |   |   |
| 59.  | Rue Monceaux                | Dr. MONCEAUX                                                                                                         |                             |   |   |   | X |
| 60.  | Rue Nemésis                 | To commemorate a war<br>ship of the same name.                                                                       | X                           |   |   |   | X |
| 61.  | Rue Nguyen-tan-<br>Nghiem   | NGUYEN-TAN-NGHIEM<br>(rare native colonial ally).                                                                    |                             |   | X |   |   |
| 62.  | Rue Noel                    | Aspirant NOEL                                                                                                        | X                           |   |   |   |   |
| 63.  | Blvd Norodom                | NORODOM (Cambodian<br>King)                                                                                          |                             |   | X |   |   |

Domain Key: 1 = Military; 2. Clergy; 3. Gov't Administration; 4. Science/Culture; 5. Other. Source: gallica.bnf.fr/Bibliothèque nationale de France.

Appendix A (Cont'd): Brief background on colonial street names in Saigon.

| ITEM | STREET NAME                   | PERSONALITY OR<br>OBJECT HONORED      | DOMAIN OF<br>ENTITY HONORED |   |   |   |   |
|------|-------------------------------|---------------------------------------|-----------------------------|---|---|---|---|
|      |                               |                                       | 1                           | 2 | 3 | 4 | 5 |
| 64.  | Rue Ohier                     | Admiral OHIER                         | X                           |   |   |   |   |
| 65.  | Rue d'Ormay                   | Marie Jules-Elie D'ORMAY              | X                           |   |   |   | X |
| 66.  | Rue Amiral Page               | Admiral PAGE                          | X                           |   |   |   |   |
| 67.  | Rue Palanca                   | Col. Gultierrez PALANCA               | X                           |   |   |   |   |
| 68.  | Rue Pasteur                   | Louis PASTEUR                         |                             |   |   | X |   |
| 69.  | Rue Pellerin                  | Msgnr. Francois<br>PELLERIN           |                             | X |   |   |   |
| 70.  | Rue Pierre                    | Dr. Jean-Baptiste PIERRE              |                             |   |   |   | X |
| 71.  | Rue Marc Pourpe               | Marc POURPE                           |                             |   |   |   | X |
| 72.  | Quai Primauguet               | LE PRIMAUGUET                         |                             |   |   |   | X |
| 73.  | Rue Richaud                   | M. RICHAUD                            |                             |   | X |   |   |
| 74.  | Place Rigault de<br>Genouilly | Capt. Charles RIGAULT<br>DE GENOUILLY | X                           |   |   |   |   |
| 75.  | Rue Amiral Roze               | Admiral ROZE                          | X                           |   |   |   |   |
| 76.  | Rue Rousseau                  | M. ROUSEAU                            |                             |   | X |   |   |
| 77.  | Rue Schroeder                 | Henri-Louis-Kart<br>SCHROEDER         |                             |   | X |   | X |
| 78.  | Rue Sohier                    | Msgnr. SOHIER                         |                             | X |   |   |   |
| 79.  | Rue Taberd                    | Msgnr. Jean-Baptiste<br>TABERD        |                             | X |   |   |   |
| 80.  | Rue Testard                   | Lt. Col. TESTARD                      | X                           |   |   |   |   |
| 81.  | Rue Thevenet                  | M.THEVENET                            |                             |   |   |   | X |
| 82.  | Rue Thomson                   | Charles THOMSON                       |                             |   | X |   |   |
| 83.  | Rue Turc                      | Dr. TURC                              |                             |   |   |   | X |
| 84.  | Rue Vannier                   | Lt. VANNIER                           | X                           |   |   |   |   |
| 85.  | Rue Vassoigne                 | Gen. DE VASSOIGNE                     | X                           |   |   |   |   |
| 86.  | Rue Verdun                    | DE VERDUN                             |                             |   |   |   | X |
| 87.  | Rue Vienot                    | M. VIENOT (Lawyer)                    |                             |   |   |   | X |

Domain Key: 1 = Military; 2. Clergy; 3. Gov't Administration; 4. Science/Culture;  
5. Other. Source: gallica.bnf.fr/Bibliothèque nationale de France.

# Appendix B: Street Nomenclature, Dakar

| ITEM | STREET NAME                                | HONOURED PERSONALITY/OBJECT        | CONTRIBUTION/SIGNIFICANCE                                                                                                                                                                                                                                                                                                                                                                                                                     |
|------|--------------------------------------------|------------------------------------|-----------------------------------------------------------------------------------------------------------------------------------------------------------------------------------------------------------------------------------------------------------------------------------------------------------------------------------------------------------------------------------------------------------------------------------------------|
| 1.   | Rue de l'Abattoire                         | Slaughter house                    | Main piece of colonial infrastructure on the street.                                                                                                                                                                                                                                                                                                                                                                                          |
| 2.   | Rue de l'Administration                    | Colonial gov't                     | In honor of French colonial administration.                                                                                                                                                                                                                                                                                                                                                                                                   |
| 3.   | Ave. Albert Sarraut                        | Albert Sarraut (1872-1962)         | He served 2 tours as Governor-General of Indochina, 1911-1914, 1916-1919.                                                                                                                                                                                                                                                                                                                                                                     |
| 4.   | Rue Alfred Goux                            | Alfred Joseph Goux                 | He was mayor of Dakar from 1943-1945.                                                                                                                                                                                                                                                                                                                                                                                                         |
| 5.   | Ambroise Mendy                             | Ambroise Mendy                     | He was one of the secretaries of the General Council in Dakar when Louis Guillaibert took over as the council's president in 1916.                                                                                                                                                                                                                                                                                                            |
| 6.   | Ave. André Lebon                           | André Lebon (1858-1938).           | He was French politico-economic analyst/writer, and colonial administrator. He was the first Minister of the colonies to visit Senegal while in office.                                                                                                                                                                                                                                                                                       |
| 7.   | Ave. de l'Arsenal                          | Arsenal                            | Deducing from the literal definition of an arsenal a collection of weapons and military equipment, the name has France's proclivity for armed conquest and domination during the colonial era. The street name, l'Arsenal appear in the toponymy of other French colonies. One example of this is in New Orleans Louisiana, USA, which also had its own version of Rue de l'Arsenal, later renamed St. Adrien, Ursule, and finally, Ursuline. |
| 8.   | Ave. Ballay                                | Noel Ballay (1847-1902).           | He was an auxiliary medical doctor in the French Navy during the colonial era.                                                                                                                                                                                                                                                                                                                                                                |
| 9.   | Ave. du Barachois                          | Barachois                          |                                                                                                                                                                                                                                                                                                                                                                                                                                               |
| 10.  | Rue de Bayeux                              | Bayeux, Normandy.                  | In honour of the Town of Bayeux in Northern Normandy, France.                                                                                                                                                                                                                                                                                                                                                                                 |
| 11.  | Route de Bel-Air a.k.a. Blvd Maritime Nord | Bel-Air                            | Street named in celebration of 'beautiful' or 'fresh' air. The alternative name, Maritime Nord is a tribute to life at sea.                                                                                                                                                                                                                                                                                                                   |
| 12.  | Rue de Belfort                             | Belfort                            |                                                                                                                                                                                                                                                                                                                                                                                                                                               |
| 13.  | Rue Bérenger Féraud                        | Dr. Jean Baptiste Bérenger Féraud. | A medical doctor in the French colonial service in Senegal. He's best known for his work on the treatment and cure of yellow fever.                                                                                                                                                                                                                                                                                                           |
| 14.  | Ave. Blaise Diagne                         | Blaise Diagne                      | Blaise Diagne was an influential indigenous Senegalese political leader who collaborated with French colonial authorities in Senegal. He was the first black African ever elected to the French Chamber of Deputies.                                                                                                                                                                                                                          |
|      |                                            |                                    |                                                                                                                                                                                                                                                                                                                                                                                                                                               |

# Appendix B: Street Nomenclature, Dakar

| ITEM | STREET NAME             | HONOURED PERSONALITY/OBJECT                    | CONTRIBUTION/SIGNIFICANCE                                                                                                                                                                                                                                                                                |
|------|-------------------------|------------------------------------------------|----------------------------------------------------------------------------------------------------------------------------------------------------------------------------------------------------------------------------------------------------------------------------------------------------------|
| 15.  | Rue Blanchot            | Maurice Blanchot (1909-2003).                  | In honour of a 20 <sup>th</sup> century French philosopher and prolific author.                                                                                                                                                                                                                          |
| 16.  | Ave. Borgnis-Desbordes  | General Gustave Borgnis-Desbordes (1839-1900). | He was instrumental in the French conquest of the territory that became known as French Sudan (present-day, Mali). He was later assigned to French colonial Senegal, where he served for 3 years (1880-1883).                                                                                            |
| 17.  | Rue de Boufflers        | Stanislas de Boufflers (1738-1815)             | In honour of a French poet who spent some time in colonial Senegal.                                                                                                                                                                                                                                      |
| 18.  | Rue Braconnier          | Poacher                                        | Origins unclear. Literally translates to Poacher Street.                                                                                                                                                                                                                                                 |
| 19.  | Ave. Brière de l'Isle   | Louis Brière de l'Isle                         | He was one-time governor of Senegal. He was instrumental in reinforcing French control on the Senegal river, the "Peanut Basin." He also played a major role in railway projects that enabled the expansion of what became known as the Federation of French West Africa.                                |
| 20.  | Rue Brunier             | Charles de Brunier                             | He served as colonial governor of Haiti from 1737 – 1746.                                                                                                                                                                                                                                                |
| 21.  | Rue Caillé              | Réné Caillé                                    | He is a 19 <sup>th</sup> century French explorer. He was instrumental in extending France's territorial dominance from the West African coast to the hinterland. He braved all odds and arrived Timbuctu, near the Upper Niger in present-day Mali in 1837.                                              |
| 22.  | Rue du Docteur Calmette | Dr. Albert Calmette                            | In honour of Dr. Albert Calmette (1863-1933), a renowned French medical scientist who is best-known for his work to produce a vaccine for tuberculosis at the Pasteur Institute in the 1920s. He served in the French colonial enterprise and was stationed in Gabon from October 1886 to November 1887. |
| 23.  | Rue Canard              |                                                |                                                                                                                                                                                                                                                                                                          |
| 24.  | Ave. Carde              | Jules Gaston Henri Carde (1874-1949)           | He was born in Algeria and served as Governor General of <a href="#">French West Africa</a> and later as Governor General of <a href="#">Algeria</a> .                                                                                                                                                   |
| 25.  | Rue Celle Diop          | Cheikh Anta Diop (1923-1986)                   | In honor of Diop, a distinguished Senegalese historian and Pan-Africanist.                                                                                                                                                                                                                               |
| 26.  | Route Champs de Courses | Racing Courses                                 | In honour of racing as a sport.                                                                                                                                                                                                                                                                          |

| ITEM | STREET NAME          | HONOURED PERSONALITY/OBJECT                | CONTRIBUTION/SIGNIFICANCE                                                                                                                                                                                                             |
|------|----------------------|--------------------------------------------|---------------------------------------------------------------------------------------------------------------------------------------------------------------------------------------------------------------------------------------|
| 27.  | Rue Charles Laisné   | Jean Charles Laisné                        | A famous architect, he graduated from France's prestigious Ecole des Beaux Arts in 1836. He is credited with restoring the Gard Bridge (Pont du Gard), an ancient Roman aqueduct across the Gardon River.                             |
| 28.  | Rue Colbert          | Jean-Baptiste Colbert                      | He was a French political leader; was Minister of Finance; played a leading role increasing France's colonial holdings.                                                                                                               |
| 29.  | Route de la Corniche | Cornice                                    | Origins unclear. Literal meaning of a cornice is an ornamental molding below the ceiling, near the floor or at the roof of a building.                                                                                                |
| 30.  | Ave. Courbet         | Anatole-Amedee-Prosper Courbet 1827-1885). | He was a French naval officer who rose to the rank of Vice Admiral and is best known for winning meaning land and naval battles in theatres in Indochina.                                                                             |
| 31.  | Rue Dagorne          | Henri Louis Félicité Victor Dagorne        | He was a French military officer who, later in his career, served as the colonial military administrator of Gorée Island from 1836 – 1845.                                                                                            |
| 32.  | Rue des Dardanelles  | Dardanelles, a.k.a., Hellespont            | Named to honour, Dardenelles, the narrow strait of international waterway in northwestern Turkey that separates Asia from Europe.                                                                                                     |
| 33.  | Rue du Debarcadère   | Landing platform or stage.                 | Named to honour landing platforms, which were critical in France's military conquest of territories especially in coastal regions.                                                                                                    |
| 34.  | Blvd de la Defense   | Defense                                    | Named in honour of France's love for, and trust in, military defense and conquest.                                                                                                                                                    |
| 35.  | Rue de Denain        | Battle of Denain                           | Named in honour of the Battle of Denain. This was part of the War of Spanish Succession, which the French, under the command of Marshal Villars won against Dutch and Austrian forces led by Prince Eugene of Savoy on 24 July, 1712. |
| 36.  | Rue Descemet         | Gabriel Omer Descemet (1879-1961)          | In honour of a Senegalese French colonial administrator who served as Lieutenant Governor of Mauritania (1931-1933).                                                                                                                  |

| ITEM | STREET NAME             | HONOURED PERSONALITY/OBJECT                        | CONTRIBUTION/SIGNIFICANCE                                                                                                                                                                                                                                                                       |
|------|-------------------------|----------------------------------------------------|-------------------------------------------------------------------------------------------------------------------------------------------------------------------------------------------------------------------------------------------------------------------------------------------------|
| 37.  | Rue Dial Dion           |                                                    |                                                                                                                                                                                                                                                                                                 |
| 38.  | Rue Hersent             | Hildervert Hersent                                 | Hersent was the owner of Hersent et Fils (Hersent & sons), a public works contractor who executed many projects for the French colonial government including major work on the Port of Dakar.                                                                                                   |
| 39.  | Rue Huart               | Baron Edouard d'Huart                              | A French noble, he served in the Provincial States of the Kingdom of the Netherlands. He secured election to the National Congress under the Liberal Unionist for the district of Virton. He later (June 1840 - November 1847) represented the Virton District in the House of representatives. |
| 40.  | Rue Jalabert            | Monsignor Hyacinthe Jalabert.                      | He served as the Spiritan Bishop of Senegambia from 1909 to 1920.                                                                                                                                                                                                                               |
| 41.  | Ave Jaureguiberry       | Jean Bermard Jaureguiberry                         | He was French naval officer who rose to the rank of rear admiral in 1869. He served in military capacities Crimea and China, and later played colonial government administration roles with the most significant being the governor of colonial governor.                                       |
| 42.  | Ave. Jean-Jaurès        | Auguste Marie Joseph Jean Léon Jaurès (1859-1914). | Renowned French politician, member of the Socialist Party, rose to the helm of the Party in 1902. He was assassinated at the outbreak of World War I.                                                                                                                                           |
| 43.  | Ave. du Maréchal Joffre | Joseph Jacques Césaire Joffre (1852-1931).         | He was a general in the French military. He served as Commander-in-Chief of French forces on the Western Front from the beginning of World War I.                                                                                                                                               |



Appendix B (Cont'd): Street Nomenclature, Dakar

| ITEM | STREET NAME     | HONOURED PERSONALITY/OBJECT                                                           | CONTRIBUTION/SIGNIFICANCE                                                                                                                                                                                                                                                   |
|------|-----------------|---------------------------------------------------------------------------------------|-----------------------------------------------------------------------------------------------------------------------------------------------------------------------------------------------------------------------------------------------------------------------------|
| 44.  | Cité Joffre     | Joseph Jacques Césaire Joffre (1852-1931).                                            | In honour of Joseph Jacques Césaire Joffre who was a general in the French military. He served as Commander-in-Chief of French forces on the Western Front from the beginning of World War I.                                                                               |
| 45.  | Rue Joris       |                                                                                       |                                                                                                                                                                                                                                                                             |
| 46.  | Rue du 18 Juin  | The June 18, 1940 Appeal by Gen. Charles de Gaulle, leader of the Free French Forces. | The appeal, which was done in London, signifies the origin of the German Resistance to the German occupation subsequent to the fall of France in World War I.                                                                                                               |
| 47.  | Rue Jules Ferry | Jules François Camille Ferry (1832-1893).                                             | Ferry once served as President of the French Senate. As statesman, he was strongly in support of French colonial expansion.                                                                                                                                                 |
| 48.  | Rue de Kaolak   |                                                                                       |                                                                                                                                                                                                                                                                             |
| 49.  | Place Kermel    | Olivier François Marie de Kermel (1760-1837).                                         | He was a French man who descended from a British noble family. He was Knight of Saint-Louis and served as a leader of the Calvary Squadron under King Louis XVI in France.                                                                                                  |
| 50.  | Rue Kleber      | Jean-Baptiste Kleber (1753-1800).                                                     | Kleber was born in 1753, and rose to the rank of a general in the French military during the French Revolutionary Wars. He was part of the force led by Napoleon during the Egyptian Campaign. He died at the young age of 47 and was buried in Strasbourg, France in 1800. |

Appendix B (Cont'd): Street Nomenclature, Dakar

| ITEM | STREET NAME               | HONOURED PERSONALITY/OBJECT                  | CONTRIBUTION/SIGNIFICANCE                                                                                                                                                                                                                                                                                           |
|------|---------------------------|----------------------------------------------|---------------------------------------------------------------------------------------------------------------------------------------------------------------------------------------------------------------------------------------------------------------------------------------------------------------------|
| 51.  | Rue Laperrine             | Henri Laperrine (1860-1920).                 | General Henri Laperrine is noted for organizing warring desert tribes in North Africa. Here, Laperrine succeeded in dislodging the Tuaregs from Sahara where they posed the most significant threat to the French territorial conquest initiatives in the region.                                                   |
| 52.  | Place du Marechal Leclerc | Philippe Leclerc de Hautechoque (1902-1947)  | Marechal Leclerc was a general in the French military during World War II. He died at the young age of 45.                                                                                                                                                                                                          |
| 53.  | Blvd de la Libération     | Liberation                                   | This street was named as France's way of paying homage to its avowed ideological stance on the liberation question.                                                                                                                                                                                                 |
| 54.  | Ave de la Liberté         | Liberty                                      | This street name like Blvd de la Liberation, has ideological overtones designed to promote France as a country that stands for liberty for all.                                                                                                                                                                     |
| 55.  | Rue Mage                  | Eugene Mage                                  | Named in honor of the French explorer, Eugene Mage who traveled extensively in Senegal and environs.                                                                                                                                                                                                                |
| 56.  | Ave. Maginot              | Andre Maginot                                | The street was named in honor of Andre Maginot who was at one point, France's Minister of War. A line marking France's border with Germany was named after him.                                                                                                                                                     |
| 57.  | Rue Malamine              | Camara Malamine                              | In honor of Malamine, a Senegalese Sergeant in the French military. He is noted for leading the squad that guarded Brazzaville, Congo PRC from Belgian troops from nearby Congo (DRC) from October 1880 to May 1882.                                                                                                |
| 58.  | Rue Malenfant             | Charles Marie François Malenfant (1763-1827) | In honor of Charles Marie Francois Malenfant. He was born in Rennes, France. He joined the French military where he rose to the rank of colonel. He served in colonial administration and was appointed to serve in the colonial government in Dominique. He is noted for opposing the 'negro revolt' in Dominique. |

Appendix B (Cont'd): Street Nomenclature, Dakar

| ITEM | STREET NAME            | HONOURED PERSONALITY/OBJECT                                 | CONTRIBUTION/SIGNIFICANCE                                                                                                                                              |
|------|------------------------|-------------------------------------------------------------|------------------------------------------------------------------------------------------------------------------------------------------------------------------------|
| 59.  | Ave. El Hadji Malik Si | El Hadji Malik Si                                           | This street was named in honor of El Hadji Malik Si, the Islamic cleric who was known for his role in facilitating the French colonization of Senegal.                 |
| 60.  | Rue Eli Manel Fall     | Eli Manel Fall (1889-1950).                                 | In honor of Eli Manel Fall, who was from the noble lineage of Damel. He graduated from the William Ponty Higher Teachers' College (Ecole Normale Supérieure) in Dakar. |
| 61.  | Rue Mangin             | Charles Mangin (1886-1925).                                 | In honor of a French Military General, Charles Mangin, who fought in World War I.                                                                                      |
| 62.  | Rue Général Marchand   | Jean-Baptiste Marchand (1863-1934)                          | In honor of General Marchand who was instrumental in commanding the French expeditionary force (the tirailleurs Senegalese) of the West African colonial infantry.     |
| 63.  | Rue Marguerite Trichot | Marguerite Trichot                                          | This street name's origin could not be ascertained. An internet search of the name Marguerite Trichot provided no clues.                                               |
| 64.  | Rue Marsat             | Marsat, a commune in Puy-de-Dôme District, Auvergne, France | Named in honor of the Marsat, a neighborhood in the Puy-de-Dôme District in Auvergne, Central France.                                                                  |
| 65.  | Rue Masclary           | Jean Paul Masclary                                          | In honor of Jean Paul Masclary who was adviser to the 'Conseil Supérieure' of Louisiana when it was part of the French Colonial Empire.                                |
| 66.  | Rue Maunoury           | Maurice Maunoury (1863-1925)                                | Named in honor of Maurice Maunoury, a French political figure who was born in Alexandria, Egypt.                                                                       |
| 67.  | Rue Mbayé Worre        | Mbaye Worre                                                 | Name in honor of Mbaye Worre, a local hero who was sympathetic to the French colonial mission in Senegal.                                                              |

Appendix B (Cont'd): Street Nomenclature, Dakar

| ITEM | STREET NAME        | HONOURED PERSONALITY/OBJECT                | CONTRIBUTION/SIGNIFICANCE                                                                                                                                                                      |
|------|--------------------|--------------------------------------------|------------------------------------------------------------------------------------------------------------------------------------------------------------------------------------------------|
| 68.  | Rue Medine         | Medina (Medine in French)                  | Named in honor of the Arab, particularly non-European neighborhoods in Francophone North African cities/towns.                                                                                 |
| 69.  | Rue Mermoz         | Jean Mermoz (1901-1936)                    | Named in memory of French Air Force pilot, Jean Mermoz. He was one of the best French Air Force pilots of his time despite the fact that it took him 3 attempts to obtain his pilot's license. |
| 70.  | Rue de Messageries | Messageries Maritime (or simply, 'MesMar') | To commemorate the French Merchant Shipping Company, Messageries Maritime that was established in 1851.                                                                                        |

There are numbered streets from Rue 1 to Rue 70.
